# Supplementary figures and images for: Pyridoxal Isonicotinoyl Hydrazone Improves Neurological Recovery by Attenuating Ferroptosis and Inflammation in Cerebral Hemorrhagic Mice
Source: Hindawi journal article supplement (doi:10.1155/2021/9916328), 2021-01-01

**a**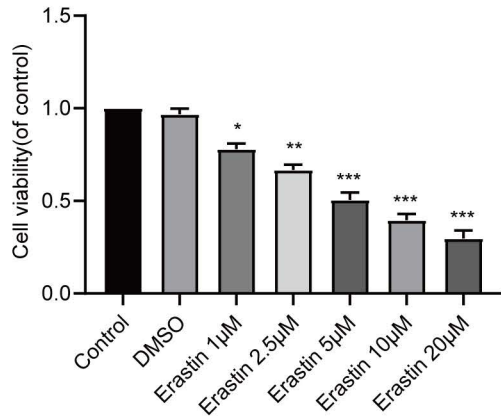**b**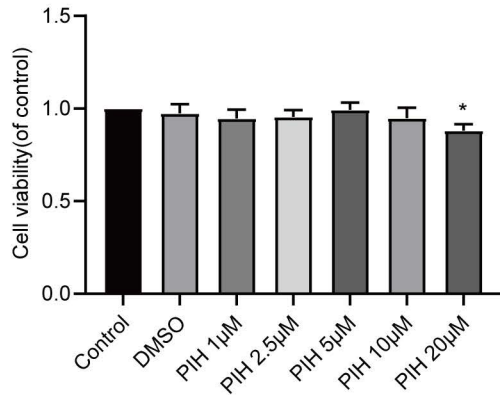

Supplement: f1 [file 9916328.f1.zip]
